# Supplementary material for: Enhanced functional DNA biosensor for distance-based read-by-eye quantification of various analytes based on starch-hydrolysis-adjusted wettability change in paper devices
Source: Royal Society of Chemistry journal article supplement (doi:10.1039/d0ra04619a), 2020-01-01
Supplement: d0ra04619a1.pdf [file d0ra04619a1.pdf]

Electronic Supplementary Information

**Enhanced functional DNA biosensor for distance-based read-by-eye  
quantification of various analytes based on starch-hydrolysis-  
adjusted wettability change in paper devices**

Yijing Chen,<sup>#</sup> Lang Zhang,<sup>#</sup> Jinkun Huang,<sup>#</sup> Zihao Deng, Yali Yuan,<sup>\*</sup> Jianmei Zou,

Jinfang Nie,<sup>\*</sup> Yun Zhang<sup>\*</sup>

*College of Chemistry and Bioengineering, Guilin University of Technology, Guilin*

*541004, P. R. China*

<sup>\*</sup> Corresponding Author.

E-mail: zy@glut.edu.cn, thankSIN2013@163.com, Niejinfang@glut.edu.cn.

Tel: +86 773 5896453; Fax: +86 773 5896839.

<sup>#</sup> These authors contributed equally.

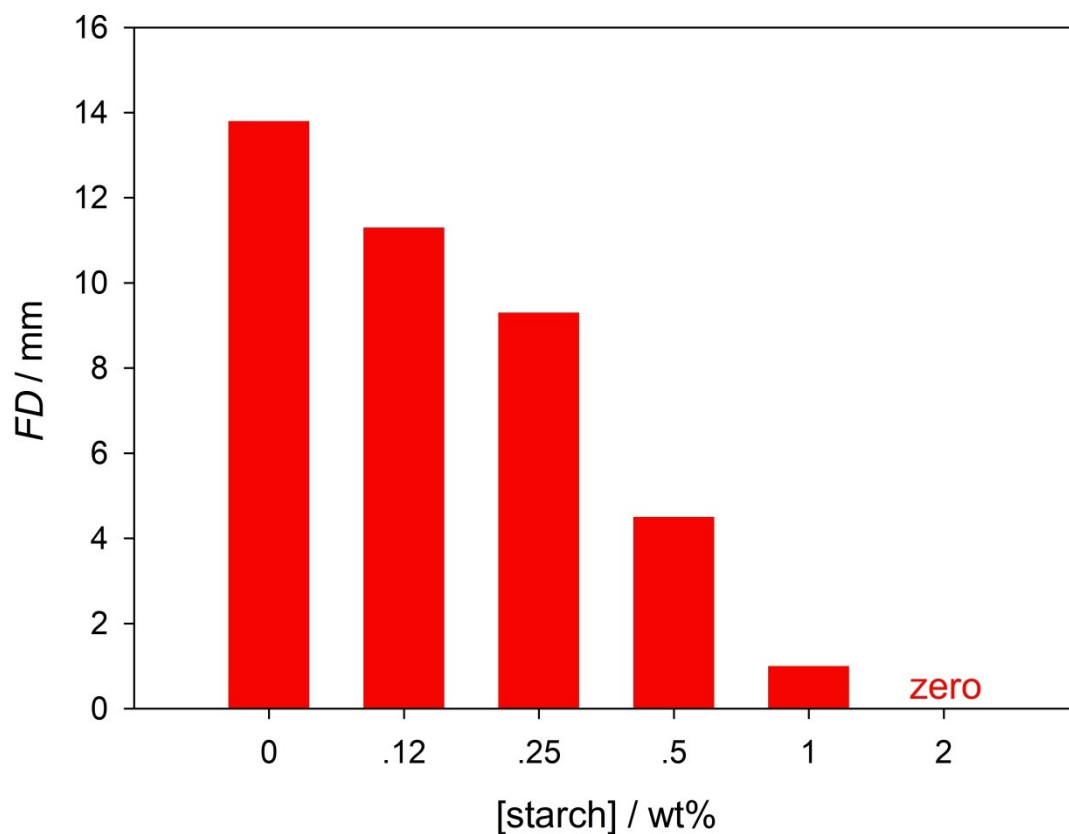

**Fig. S1.** Investigation of the effect of starch concentration on flowing distance (*FD*) of red ink in paper devices. The results showed that the ink's *FD* values were inversely yet linearly associated with the starch levels in a proper range, but too high a starch level (e.g., 2 wt%) could totally block the paper's porous microstructures resulting in no ink flowing in the paper body.

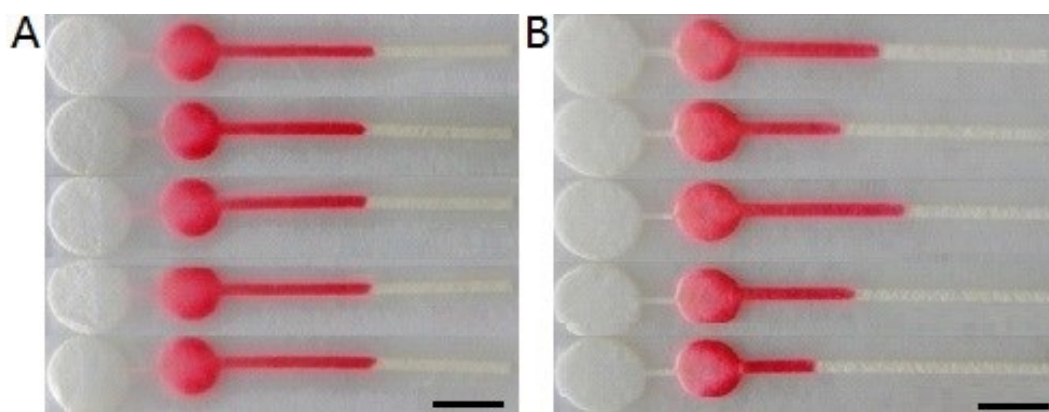

**Fig. S2.** Comparative study of the flowing of red ink in the paper devices with (A) or without (B) the encapsulation of transparent adhesive tape. The results showed that more stable (repeatable) ink flowing were obtained in the encapsulated paper devices. The scale bar is 3.5 mm.

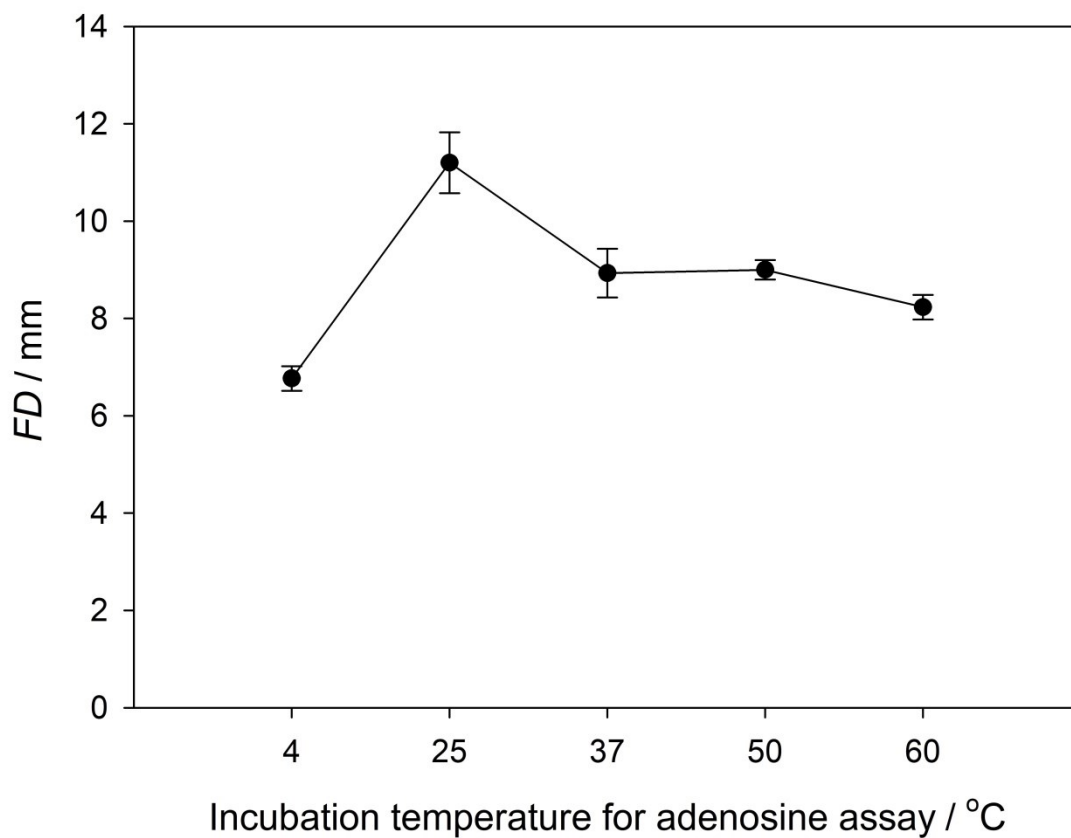

**Fig. S3.** Optimization of the temperature for incubating aptamer-loaded superparamagnetic microbeads, adenosine sample (50  $\mu\text{M}$ ), and enzyme-loaded  $\text{SiO}_2$  microbeads. The *FD* results showed that 25  $^\circ\text{C}$  should be chosen as the optimal incubation temperature to produce the highest *FD* signal.

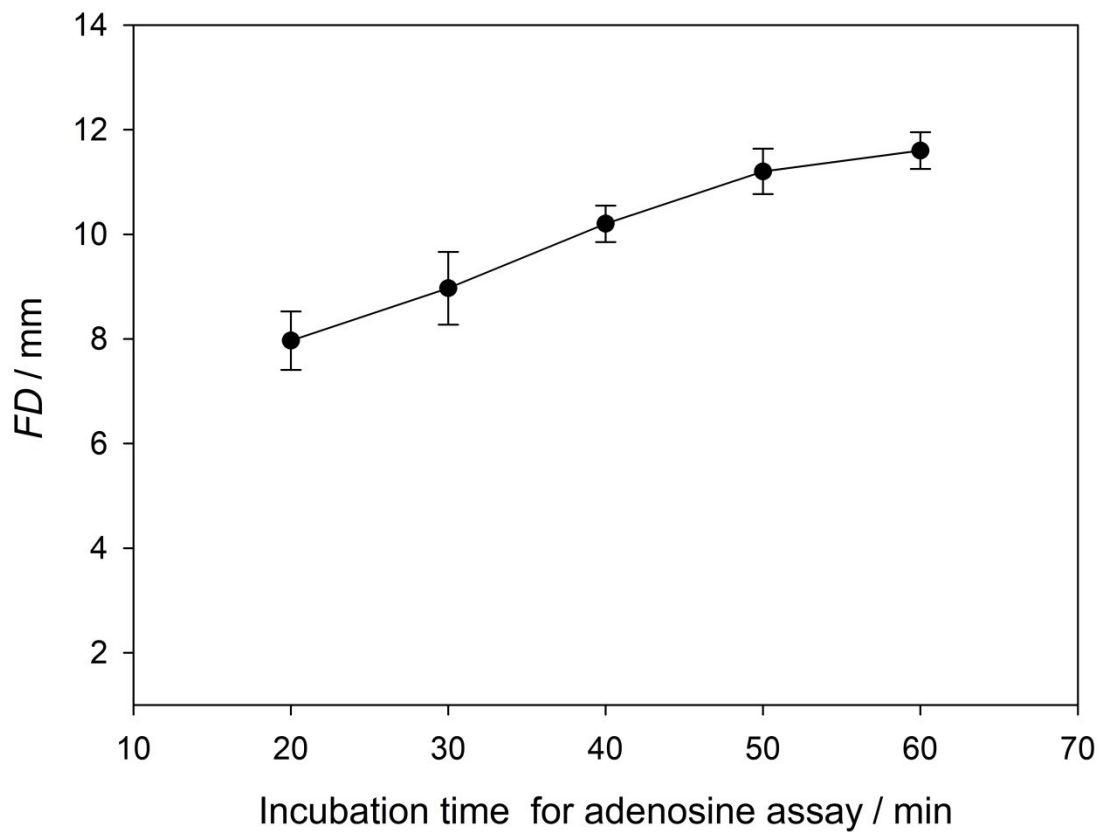

**Fig. S4.** Optimization of the time for incubating aptamer-loaded super-paramagnetic microbeads, adenosine sample (50  $\mu\text{M}$ ), and enzyme-loaded  $\text{SiO}_2$  microbeads. The *FD* results showed that 60 min should be chosen as the optimal incubation temperature because no obvious increase in the *FD* signal was observed as such a period of incubation time was applied.

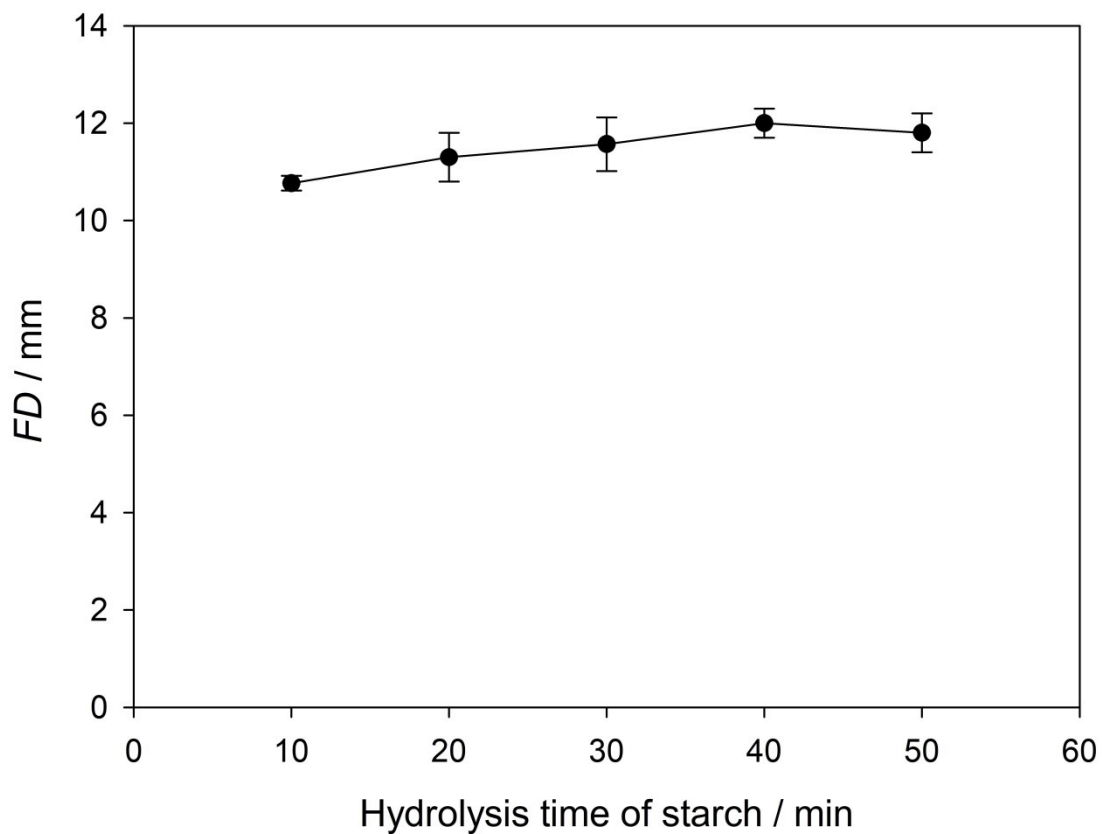

**Fig. S5.** Optimization of the time for hydrolyzing starch in the assay of 50  $\mu\text{M}$  adenosine sample. The *FD* results showed that 40 min should be chosen as the optimal hydrolysis time because no obvious increase in the *FD* signal was observed as longer periods of hydrolysis time were applied.

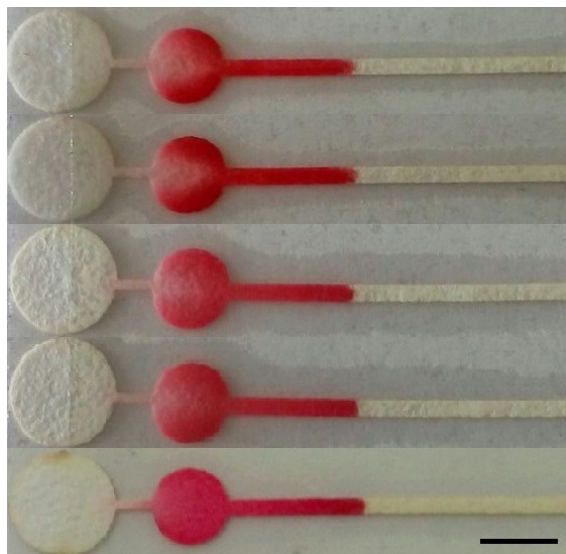

**Fig. S6.** Assay results obtained from five  $1.7 \mu\text{M}$  adenosine samples (in buffer) under the same experimental conditions using the developed adenosine assay method. The relative standard deviation of the resultant  $FD$  values was calculated to be  $\sim 3.1\%$  ( $n = 5$ ). The scale bar is 3.5 mm.

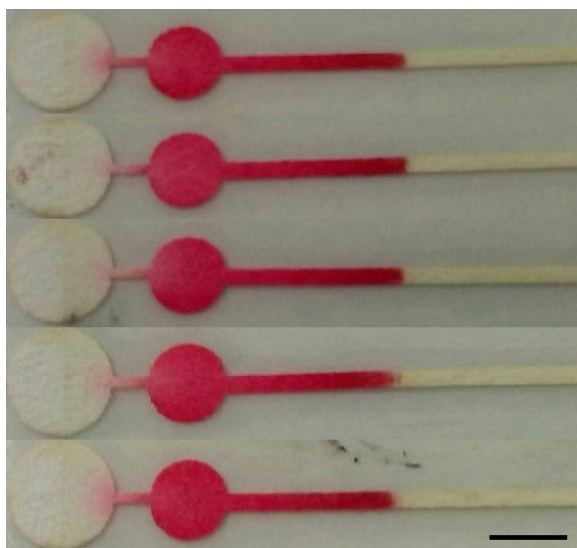

**Fig. S7.** Assay results obtained from five 15  $\mu\text{M}$  adenosine samples (in buffer) under the same experimental conditions using the developed adenosine assay method. The relative standard deviation of the resultant  $FD$  values was calculated to be  $\sim 4.4\%$  ( $n = 5$ ). The scale bar is 3.5 mm.



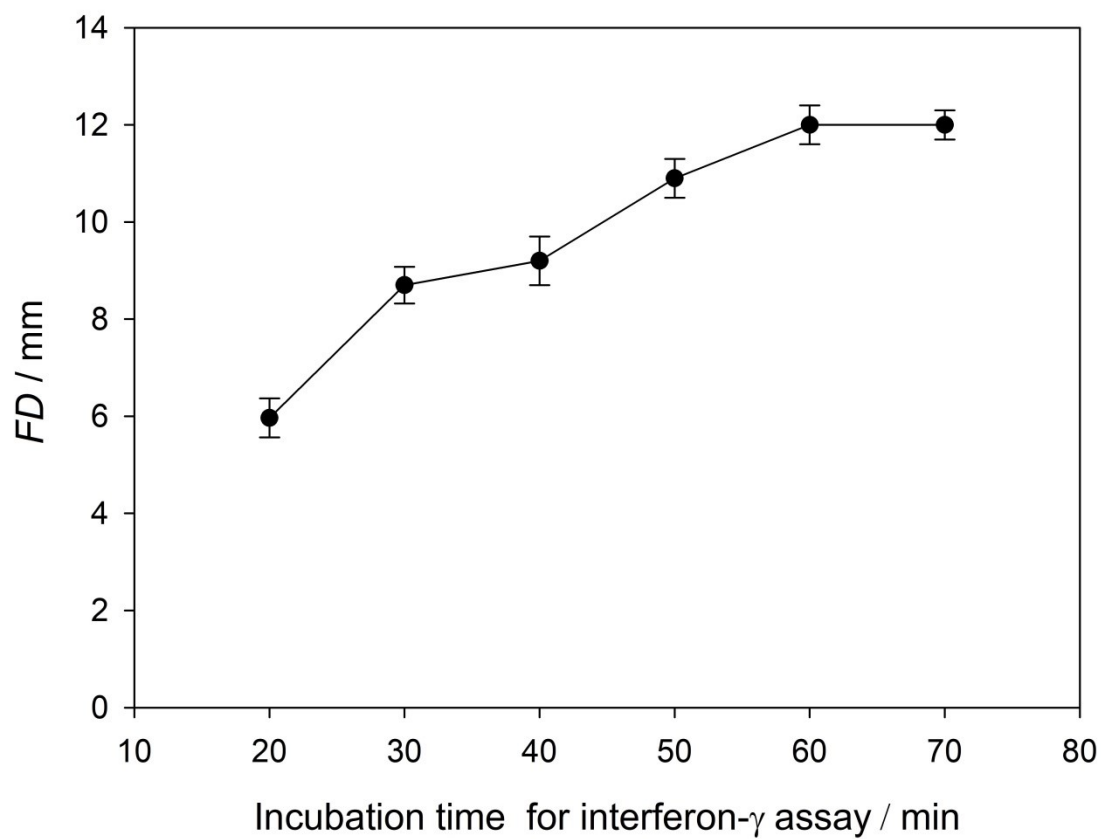

**Fig. S8.** Optimization of the time for incubating aptamer-loaded super-paramagnetic microbeads, interferon- $\gamma$  sample (35 nM), and enzyme-loaded SiO<sub>2</sub> microbeads. The *FD* results showed that 60 min should be chosen as the optimal incubation temperature because no obvious increase in the *FD* signal was observed as longer periods of incubation time were applied.

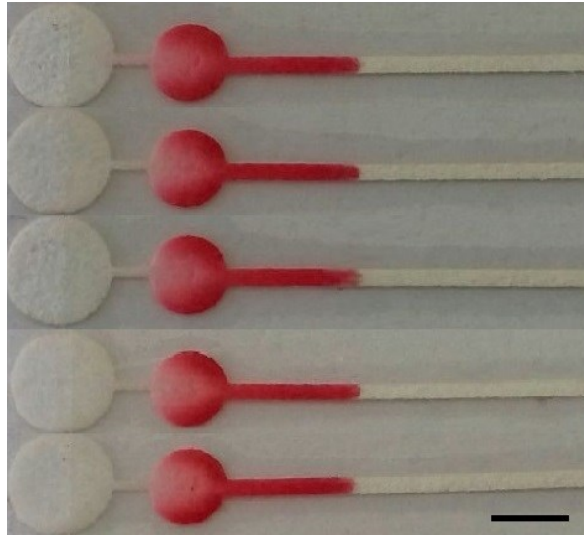

**Fig. S9.** Assay results obtained from five 0.5 nM interferon- $\gamma$  samples (in buffer) under the same experimental conditions using the developed adenosine assay method. The relative standard deviation of the resultant  $FD$  values was calculated to be  $\sim 2.7\%$  ( $n = 5$ ). The scale bar is 3.5 mm.

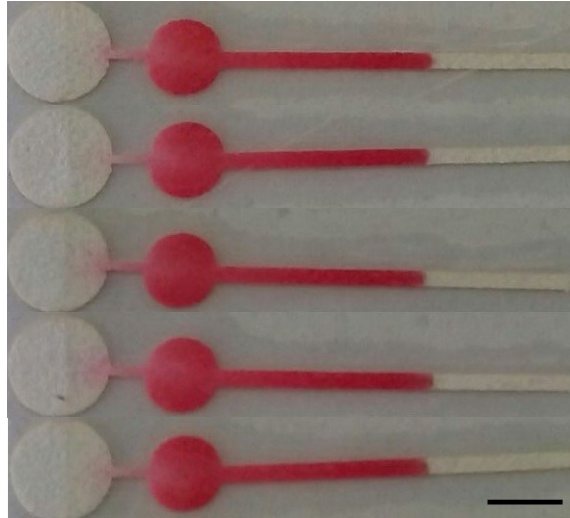

**Fig. S10.** Assay results obtained from five 32 nM interferon- $\gamma$  samples (in buffer) under the same experimental conditions using the developed adenosine assay method. The relative standard deviation of the resultant  $FD$  values was calculated to be  $\sim 4.6\%$  ( $n = 5$ ). The scale bar is 3.5 mm.

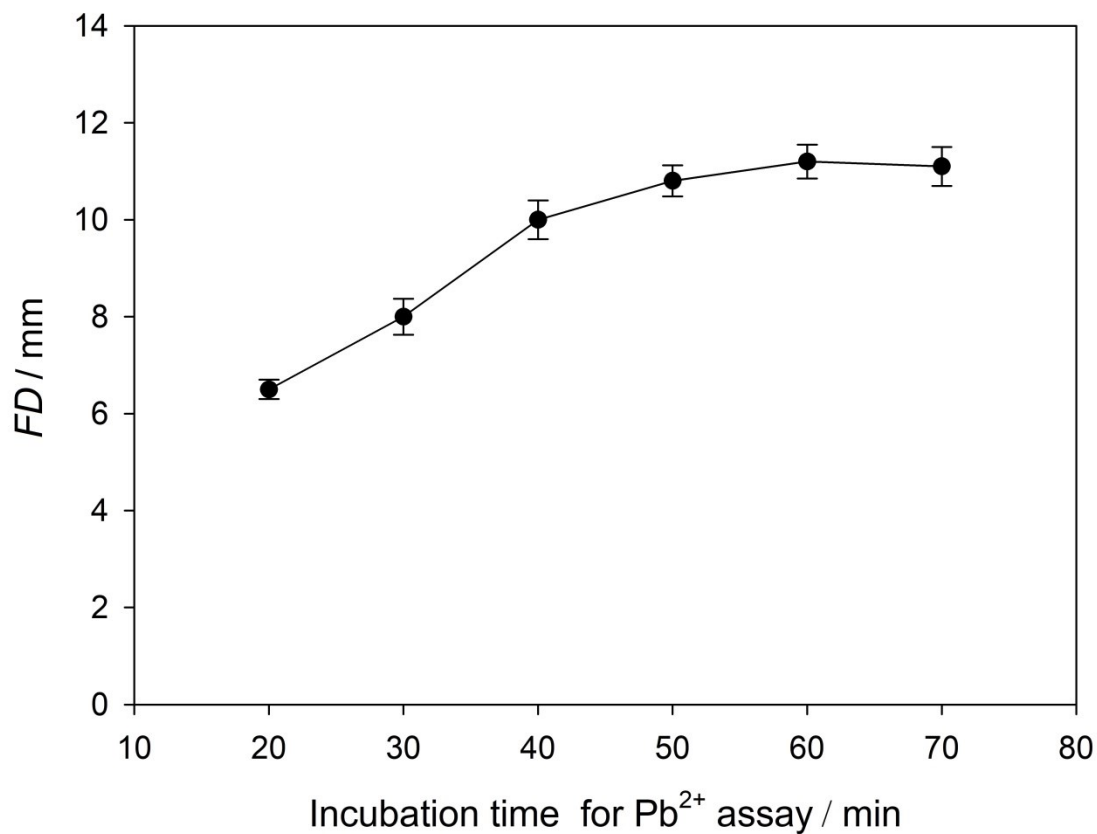

**Fig. S11.** Optimization of the time for incubating aptamer-loaded super-paramagnetic microbeads, Pb<sup>2+</sup> sample (50 nM), and enzyme-loaded SiO<sub>2</sub> microbeads. The *FD* results showed that 60 min should be chosen as the optimal incubation temperature because no obvious increase in the *FD* signal was observed as longer periods of incubation time were applied.

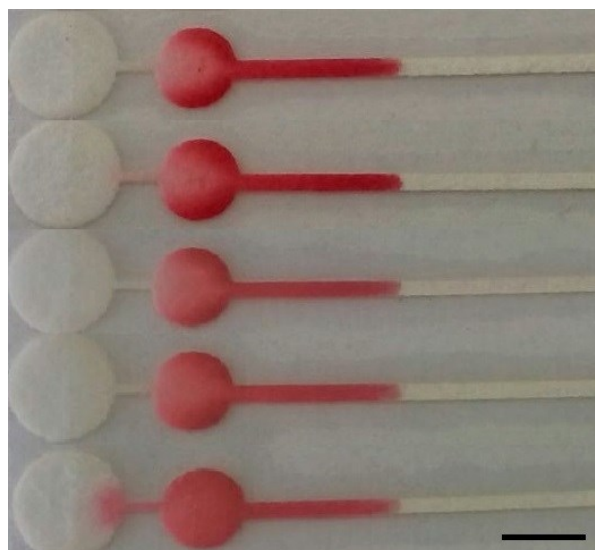

**Fig. S12.** Assay results obtained from five 3 nM  $\text{Pb}^{2+}$  samples (in buffer) under the same experimental conditions using the developed adenosine assay method. The relative standard deviation of the resultant  $FD$  values was calculated to be  $\sim 1.9\%$  ( $n = 5$ ).

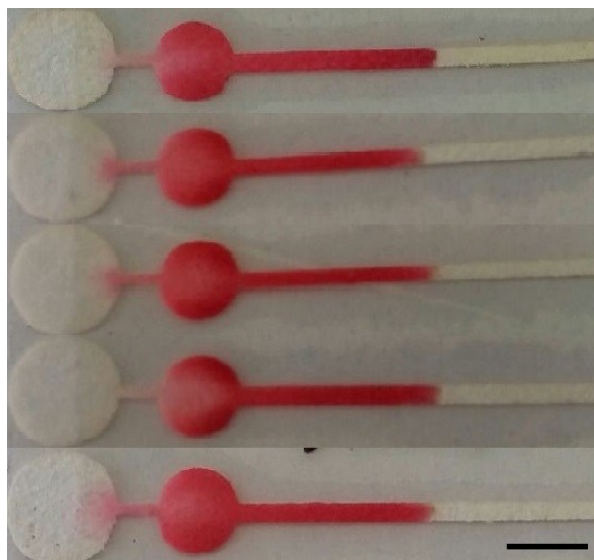

**Fig. S13.** Assay results obtained from five 12 nM  $\text{Pb}^{2+}$  samples (in buffer) under the same experimental conditions using the developed adenosine assay method. The relative standard deviation of the resultant  $FD$  values was calculated to be  $\sim 2.7\%$  ( $n = 5$ ).

**Table S1** Performance comparison of the developed adenosine assay method with some recently-reported representative ones

| Detection technique                                                                           | LOD <sup>a</sup> | LCR <sup>b</sup> | Instrument cost <sup>d</sup><br>(US \$)                                                       | Ref.      |
|-----------------------------------------------------------------------------------------------|------------------|------------------|-----------------------------------------------------------------------------------------------|-----------|
| Fluorescent measurement using a Hitachi F-7000 spectrometer                                   | 1 $\mu$ M        | 1 $\mu$ M-100 mM | ~29,000-43,000                                                                                | 1         |
| Electrochemical measurement using an Autolab PGSTAT302N                                       | 10.9 $\mu$ M     | NA <sup>c</sup>  | ~29,000-43,000                                                                                | 2         |
| Electrochemical measurement using an Autolab PGSTAT302N                                       | 3 $\mu$ M        | 10-2500 $\mu$ M  | ~29,000-43,000                                                                                | 3         |
| Electrochemical measurement for nanopore platform using a CEZ-2400 patchclamp amplifier       | 0.9 $\mu$ M      | 1-100 $\mu$ M    | ~24,000-26,000                                                                                | 4         |
| Surface plasmon resonance                                                                     | 1 $\mu$ M        | NA <sup>c</sup>  | Typically tens to hundreds of thousands of dollars                                            | 5         |
| Surface-enhanced Raman scattering                                                             | 10 nM            | 10 nM-10 $\mu$ M | Typically tens to hundreds of thousands of dollars                                            | 6         |
| Electromagnetic piezoelectric acoustic platform                                               | 0.3 $\mu$ M      | 0.5-5 $\mu$ M    | NA <sup>c</sup>                                                                               | 7         |
| Glucose measurement using a personal glucose meter                                            | 3.4 $\mu$ M      | 0-500 $\mu$ M    | (No analytical instrument was used; a personal glucose meter typically costs tens of dollars) | 8         |
| Colorimetric analysis with UV/Vis spectroscopy recorded on a Hitachi U-3010 spectrophotometer | 1 $\mu$ M        | 0-200 $\mu$ M    | > 1,000                                                                                       | 9         |
|                                                                                               | NA <sup>c</sup>  | 0-800 $\mu$ M    |                                                                                               | 10        |
| Distance-based measurement in paper devices                                                   | 20 $\mu$ M       | 0-200 $\mu$ M    | (No analytical instrument was used, a ruler typically costs < 1 dollar)                       | 11        |
|                                                                                               | 0.16 $\mu$ M     | 0.39-25 $\mu$ M  |                                                                                               | 12        |
|                                                                                               | 1.6 $\mu$ M      | 1.7-62.5 $\mu$ M |                                                                                               | This work |

<sup>a</sup> LOD, limit of detection.

<sup>b</sup> LCR, linear concentration range.

<sup>c</sup> NA, not available in the literature.

<sup>d</sup> The information on the reference price per instrument was obtained from the internet.

**Table S2** Recovery of adenosine in human serum samples

| Sample | Added (pM) | Found <sup>a</sup> (pM) | Recovery (%) | RSD <sup>b</sup> (% , n=6) |
|--------|------------|-------------------------|--------------|----------------------------|
| 1      | 2.00       | 1.95                    | 97.74%       | 7.13                       |
| 2      | 5.00       | 4.67                    | 97.26%       | 3.05                       |
| 3      | 10.00      | 10.11                   | 101.07%      | 5.83                       |

<sup>a</sup> The adenosine concentrations in the samples determined using the proposed method.

<sup>b</sup> RSD, relative standard deviations.



**Table S3** Performance comparison of the developed interferon- $\gamma$  assay method with some recently-reported representative ones

| Detection technique                                                           | LOD <sup>a</sup> | LCR <sup>b</sup> | Instrument cost <sup>c</sup><br>(US \$)                                                       | Ref.      |
|-------------------------------------------------------------------------------|------------------|------------------|-----------------------------------------------------------------------------------------------|-----------|
| Surface plasmon resonance                                                     | 10 pM            | 0.01-1 nM        | Typically tens to hundreds of thousands of dollars                                            | 13        |
| Fluorescent measurement using a plate reader                                  | 5 nM             | 5 nM-100 $\mu$ M | Typically tens to hundreds of thousands of dollars                                            | 14        |
| Electrochemical measurement using an Agilent semiconductor parameter analyzer | 83 pM            | 0-10 $\mu$ M     | Typically thousands to tens of thousands of dollars                                           | 15        |
| Electrochemical measurement using a MultiWE32 multichannel potentiostat       | 3.9 nM           | 3-1.5 $\mu$ M    | NA <sup>d</sup>                                                                               | 16        |
| Electrochemical measurement using a CHI6273E potentiostat                     | 11.56 pM         | 22.22-110 pM     | ~3,600-8,300                                                                                  | 17        |
| Electrochemical measurement using an electrochemical workstation              | 0.3 nM           | 0.5-300 nM       | Typically thousands of dollars                                                                | 18        |
| Electrochemical measurement using a CHI 842B electrochemical workstation      | 60 pM            | 60 pM-10 nM      | NA <sup>d</sup>                                                                               | 19        |
| Glucose measurement with a personal glucose meter                             | 3.4 $\mu$ M      | 0-500 $\mu$ M    | (No analytical instrument was used; a personal glucose meter typically costs tens of dollars) | 8         |
| Distance measurement in paper devices                                         | 0.2 nM           | 0.25-32 nM       | (No analytical instrument was used, a ruler typically costs < 1 dollar)                       | This work |

<sup>a</sup> LOD, limit of detection.

<sup>b</sup> LCR, linear concentration range.

<sup>c</sup> The information on the reference price per instrument was obtained from the internet.

<sup>d</sup> NA, not available on the internet.

**Table S4** Performance comparison of the developed Pb<sup>2+</sup> assay method with some recently-reported representative ones

| Detection technique                                                                                         | LOD <sup>a</sup>      | LCR <sup>b</sup>              | Instrument cost <sup>c</sup><br>(US \$)                                    | Ref.      |
|-------------------------------------------------------------------------------------------------------------|-----------------------|-------------------------------|----------------------------------------------------------------------------|-----------|
| Fluorescent measurement using a Hitachi F-7000 spectrometer                                                 | 34 nM                 | 0.1-5 μM                      | ~29,000-43,000                                                             | 20        |
| Fluorescent measurement using a Tecan Spark multimode microplate reader                                     | 23.5 nM               | 100-600 nM                    | ~4,600                                                                     | 21        |
| Fluorescent measurement using a Edinburgh FS5 spectrometer                                                  | 10 nM                 | 10 nM-1 μM                    | ~70,000-140,000                                                            | 22        |
| Rayleigh scattering measurement using a Hitachi F-4500 spectrometer                                         | 0.5 nM                | 2 nM-5 μM                     | >29,000                                                                    | 23        |
| Evanescence wave all-fiber measurement using a home-made platform                                           | 20 nM                 | 0-10 μM                       | NA <sup>d</sup>                                                            | 24        |
| Colorimetric analysis with UV/Vis spectroscopy recorded on a PerkinElmer Lambda 25 UV-vis spectrophotometer | 59.3 pM               | 0-1 nM                        | ~9,800-14,000                                                              | 25        |
| Colorimetric analysis with UV/Vis spectroscopy recorded on a Shimadzu UV2550 spectrophotometer              | 2 μM                  | 2-250 μM                      | ~7,000-9,800                                                               | 26        |
| Colorimetric analysis with UV/Vis spectroscopy recorded on a PerkinElmer Lambda 950 spectrophotometer       | 13 nM                 | 0.03-2 μM                     | ~70,000-127,000                                                            | 27        |
| Colorimetric analysis with UV/Vis spectroscopy recorded on a Shimadzu UV-1800 spectrophotometer             | 0.02 nM               | 0.05-5 nM                     | ~5,000                                                                     | 28        |
| Electrochemical measurement using a CHI 660D electrochemical workstation                                    | 3 nM                  | 5 nM-2 μM                     | >7,000                                                                     | 29        |
| Electrochemical measurement using a CHI760D electrochemistry system                                         | 0.012 nM              | 0.05-100 nM                   | >7,000                                                                     | 30        |
| Distance-based measurement in paper devices                                                                 | 50 mg/L<br>(~0.24 mM) | 50-100 mg/L<br>(~0.24-2.4 mM) | (No analytical instrument was used and a ruler typically costs < 1 dollar) | 31        |
|                                                                                                             | NA <sup>d</sup>       | 0.1-2000 nM                   |                                                                            | 32        |
|                                                                                                             | 0.5 nM                | 0.75-50 nM                    |                                                                            | This work |

<sup>a</sup> LOD, limit of detection.

<sup>b</sup> LCR, linear concentration range.

<sup>c</sup> The information on the reference price per instrument was obtained from the internet.

<sup>d</sup> NA, not available on the internet.

**Table S5** Recovery of Pb<sup>2+</sup> in several real water samples.

| Sample         | Found <sup>a</sup> (nM) | Added (nM) | Total <sup>b</sup> (nM) | Recovery (%) | RSD <sup>c</sup> (% , n=6) |
|----------------|-------------------------|------------|-------------------------|--------------|----------------------------|
| Drinking water |                         |            |                         |              |                            |
| 1              | 0.00                    | 5.00       | 5.08                    | 101.6        | 2.99                       |
| 2              | 0.00                    | 10.00      | 9.98                    | 99.8         | 1.70                       |
| 3              | 0.00                    | 20.00      | 19.7                    | 98.5         | 2.09                       |
| Tap water      |                         |            |                         |              |                            |
| 1              | 0.00                    | 5.00       | 5.21                    | 104.2        | 2.70                       |
| 2              | 0.00                    | 10.00      | 9.71                    | 97.1         | 3.22                       |
| 3              | 0.00                    | 20.00      | 20.73                   | 103.6        | 3.80                       |
| Pond water     |                         |            |                         |              |                            |
| 1              | 0.00                    | 5.00       | 5.48                    | 109.6        | 3.70                       |
| 2              | 0.00                    | 10.00      | 10.07                   | 100.7        | 4.93                       |
| 3              | 0.00                    | 20.00      | 19.08                   | 95.4         | 3.40                       |

<sup>a</sup> The original Pb<sup>2+</sup> concentrations in the samples detected using atomic absorption spectroscopy.

<sup>b</sup> The total Pb<sup>2+</sup> concentrations in the samples determined using the proposed method.

<sup>c</sup> RSD, relative standard deviations.

## Reference

1. S.J. Xie, H. Zhou, D.Y. Liu, G.L. Shen, R.Q. Yu, Z.S. Wu, *Biosens. Bioelectron.* 2013, 44, 95-100.
2. L. Poltorak, I. Eggink, M. Hoitink, E.J.R. Sudhölter, Marcel de Puit, *Anal. Chem.* 2018, 90, 7428-7433.
3. M. de Jong, A. Florea, A. de Vries, A.L.N. van Nuijs, A. Covaci, F. Van Durme, J.C. Martins, N. Samyn, K.D. Wael, *Anal. Chem.* 2018, 90, 5290-5297.
4. R. Kawano, T. Osaki, H. Sasaki, M. Takinoue, S. Yoshizawa, S. Takeuchi, *J. Am. Chem. Soc.* 2011, 133, 8474-8477.
5. E. Golub, G. Pelossof, R. Freeman, H. Zhang, I. Willner, *Anal. Chem.* 2009, 81, 9291-9298.
6. M. Oroval, M. Coronado-Puchau, J. Langer, M.N. Sanz-Ortiz, Á. Ribes, E. Aznar, C. Coll, M.D. Marcos, F. Sancenón, L.M. Liz-Marzán, R. Martínez-Mañez, *Chem. Eur. J.* 2016, 22, 13488-13495.
7. M.A.D. Neves, C. Blaszykowski, M. Thompson, *Anal. Chem.* 2016, 88, 3098-3106.
8. Y. Xiang, Y. Lu, *Nat. Chem.* 2011, 3, 697-703.
9. J. Zhang, L.H. Wang, D. Pan, S.P. Song, F.Y.C. Boey, H. Zhang, C.H. Fan, *Small* 2008, 4, 1196-1200.
10. X.F. Wei, T. Tian, S.S. Jia, Z. Zhu, Y.L. Ma, J.J. Sun, Z.Y. Lin, C.J. Yang, *Anal. Chem.*, 2016, 88, 2345-2352.
11. T. Tian, Y. An, Y.P. Wu, Y.L. Song, Z. Zhu, C.Y. Yang, *ACS Appl. Mater. Interfaces*, 2017, 9, 30480-30487.
12. Y. Zhang, D. Gao, J.L. Fan, J.F. Nie, S.W. Le, W.Y. Zhu, J.N. Yang, J.P. Li, *Biosens. Bioelectron.*, 2016, 78, 538-546.
13. D.Z. Lin, P.C. Chuang, P.C. Liao, J.P. Chen, Y.F. Chen, *Biosens. Bioelectron.* 2016, 81, 221-228.
14. N. Tuleuova, C.N. Jones, J. Yan, E. Ramanculov, Y. Yokobayashi, A. Revzin, *Anal. Chem.* 2010, 82, 1851-1857.
15. S. Farid, X. Meshik, M. Choi, S Mukherjee, Y. Lan, D. Parikh, S. Poduri, U. Baterdene, C.E. Huang, Y.Y. Wang, P. Burke, M. Dutta, M.A. Stroschio, *Biosens. Bioelectron.* 2015, 71, 294-299.
16. Y. Chen, T.S. Pui, P. Kongsuphol, K.C. Tang, S.K. Arya, *Biosens. Bioelectron.* 2014, 53, 257-262258.

17. S.W. Ding, C. Mosher, X.Y. Lee, S.R. Das, A.A. Cargill, X.H. Tang, B.L. Chen, E.S. McLamore, C. Gomes, J.M. Hostetter, J.C. Claussen, *ACS Sens.* 2017, 2, 210-217.
18. J.J. Zhao, C.F. Chen, L.L. Zhang, J.H. Jiang, R.Q. Yu, *Biosens. Bioelectron.* 2012, 36, 129-134.
19. Y. Liu, N. Tuleouva, E. Ramanculov, A. Revzin, *Anal. Chem.* 2010, 82, 8131-8136.
20. H.Z. Lu, S.F. Xu, J.Q. Liu, *ACS Sensor* 2019, 4, 1917-1924.
21. D. Peng, Y.Q. Li, Z.C. Huang, R.P. Liang, J.D. Qiu, J.W. Liu, *Anal. Chem.* 2019, 91, 11403-11408.
22. Z. Yu, W. Zhou, J. Han, Y.C. Li, L.Z. Fan, X.H. Li, *Anal. Chem.* 2016, 88, 9375-9380.
23. W. Ren, Y. Zhang, Y.Z. Fan, J.X. Dong, N.B. Li, H.Q. Luo, *J. Hazard. Mater.* 2017, 336, 195-201.
24. S.T. Han, X.H. Zhou, Y.F. Tang, M. He, X.Y. Zhang, H.C. Shi, Y. Xiang, *Biosens. Bioelectron.* 2016, 80, 265-272.
25. Z.J. Huang, J.M. Chen, Z.W. Luo, X.Q. Wang, Y.X. Duan, *Anal. Chem.* 2019, 91, 4806-4813.
26. H. Liao, G.J. Liu, Y. Liu, R. Li, W.S. Fu, L.Z. Hu, *Chem. Commun.* 2017, 53, 10160-10163.
27. Y.M. Yu, Y. Hong, P. Gao, M.K. Nazeeruddin, *Anal. Chem.* 2016, 88, 24, 12316-12322.
28. W. Yun, D.Z. Cai, J.L. Jiang, P.X. Zhao, Y. Huang, G. Sang, *Biosens. Bioelectron.* 2016, 80, 187-193.
29. H.K. Xing, J.K. Xu, X.F. Zhu, X.M. Duan, L.M. Lu, Y.X. Zuo, Y.S. Zhang, W.M. Wang, *J. Electroanal. Chem.* 2016, 782, 250-255.
30. C. Zhang, C. Lai, G.M. Zeng, D.L. Huang, L. Tang, C.P. Yang, Y.Y. Zhou, L. Qin, M. Cheng, *Biosens. Bioelectron.* 2016, 81, 61-67.
31. S. Buking, P. Saetear, W. Tiyaopongpattana, K. Uraisin, P. Wilairat, D. Nacapricha, N. Ratanawimarnwong, *Anal. Sci.*, 2018, 34, 83-89.
32. Y. Zhang, J.M. Xu, S. Zhou, L. Zhu, X. Lv, J. Zhang, L.N. Zhang, P.H. Zhu, J.H.

Yu, Anal. Chem. 2020, 92, 3874–3881.
